# Supplementary material for: Removal of Chromates and Sulphates by Mg/Fe LDH and Heterostructured LDH/Halloysite Materials: Efficiency, Selectivity, and Stability of Adsorbents in Single- and Multi-Element Systems
Source: MDPI journal article supplement (doi:10.3390/ma12091373), 2019-04-28
Supplement: s1 [file s1]

Supplementary Information

# Removal of Chromates and Sulphates by Mg/Fe LDH and Heterostructured LDH/Halloysite Materials: Efficiency, Selectivity, and Stability of Adsorbents in Single- and Multi-Element Systems

Jakub Matusik \* and Karolina Rybka

Department of Mineralogy, Petrography and Geochemistry, Faculty of Geology, Geophysics and Environmental Protection, AGH University of Science and Technology, al. Mickiewicza 30, 30-059 Krakow, Poland; krybka@agh.edu.pl

\* Correspondence: jmatusik@agh.edu.pl; Tel.: +48-126175233

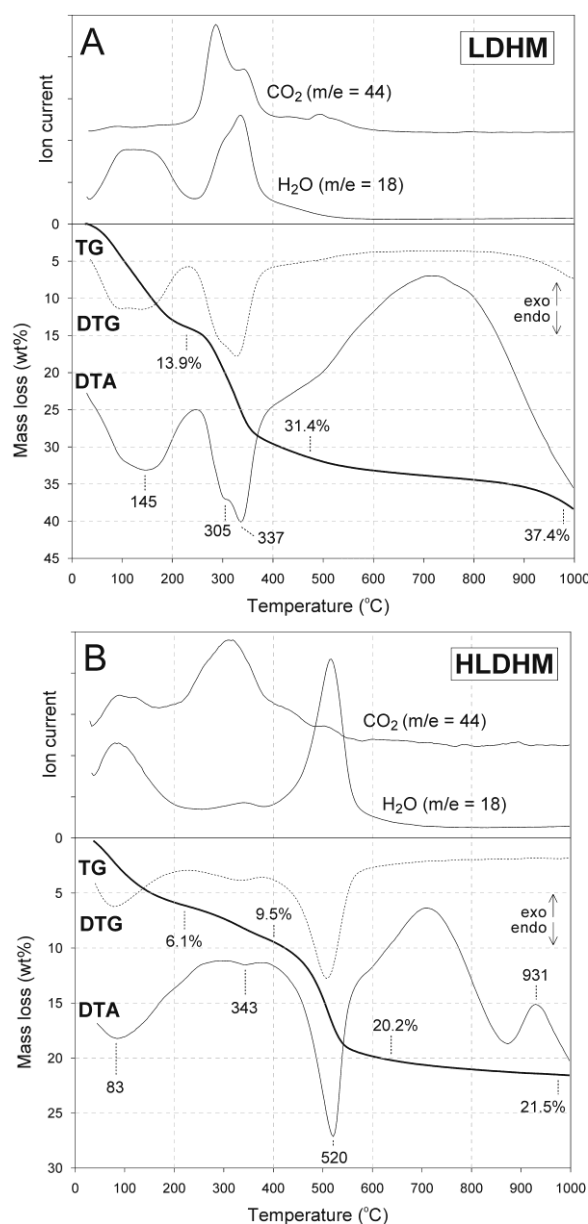

**Figure S1.** Thermal curves of: (a) LDHM; (b) H-LDHM.

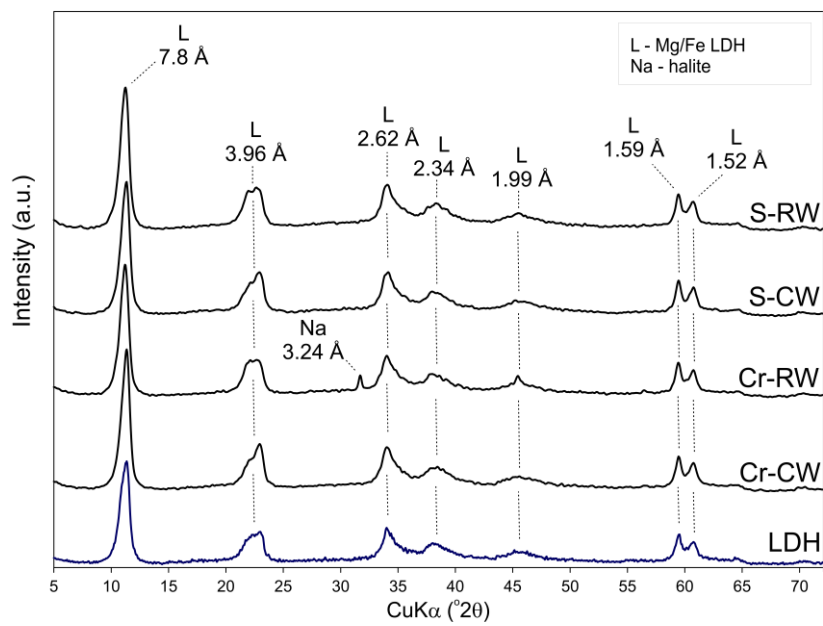

**Figure S2.** XRD patterns of the LDH material after adsorption in multi-element wastewaters.

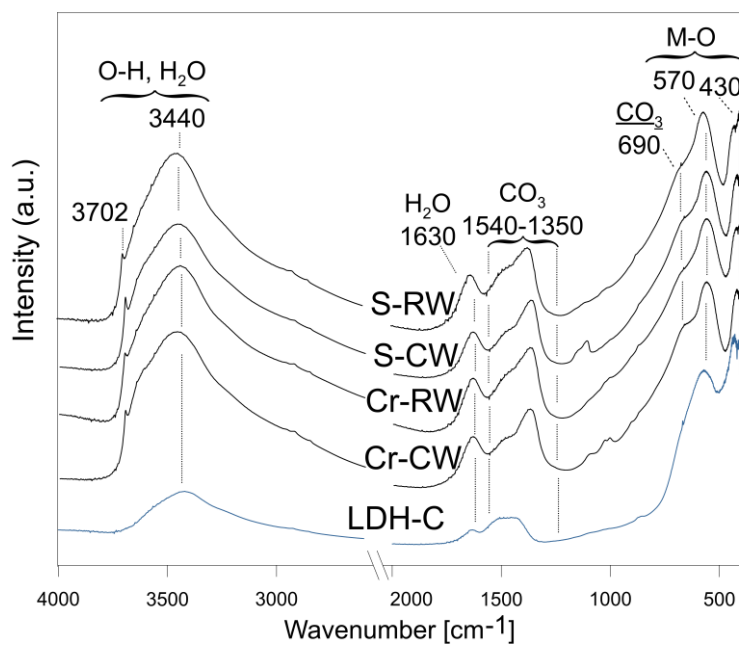

**Figure S3.** FTIR spectra of the LDH material after adsorption in multi-element wastewaters.
